# Supplementary material for: Docosapentaenoic Acid (DPA, 22:5n-3) Alleviates Ulcerative Colitis via Modification of Gut Microbiota and Their Metabolism
Source: MDPI journal article supplement (doi:10.3390/nu14194204), 2022-10-09
Supplement: s1 [file s1]

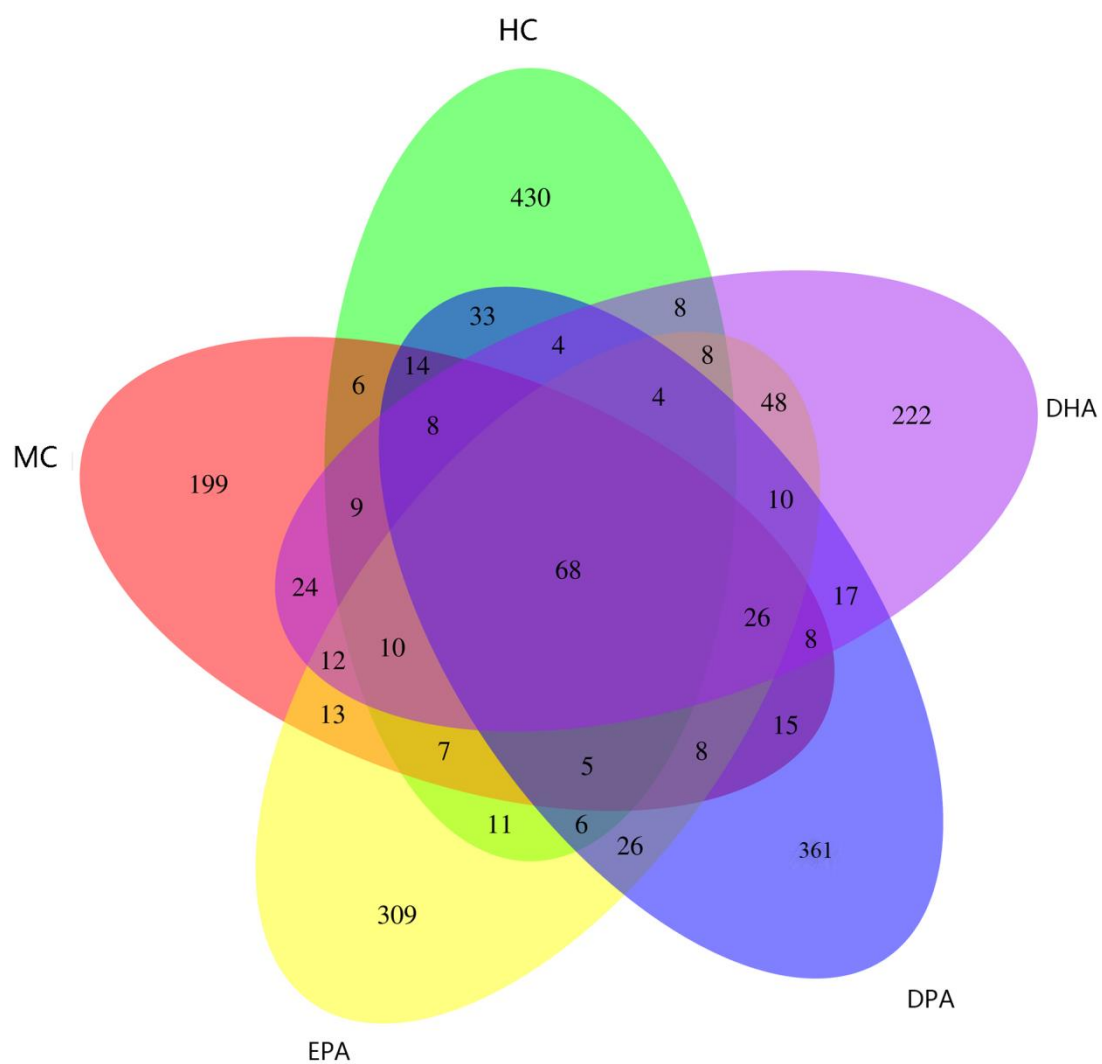

**Figure S1.** The Venn diagram of the gut microbiota in the different groups. Note: EPA, DPA, DHA, MC, HC represented EPA group, DPA group, DHA group, model control group, health control group respectively.

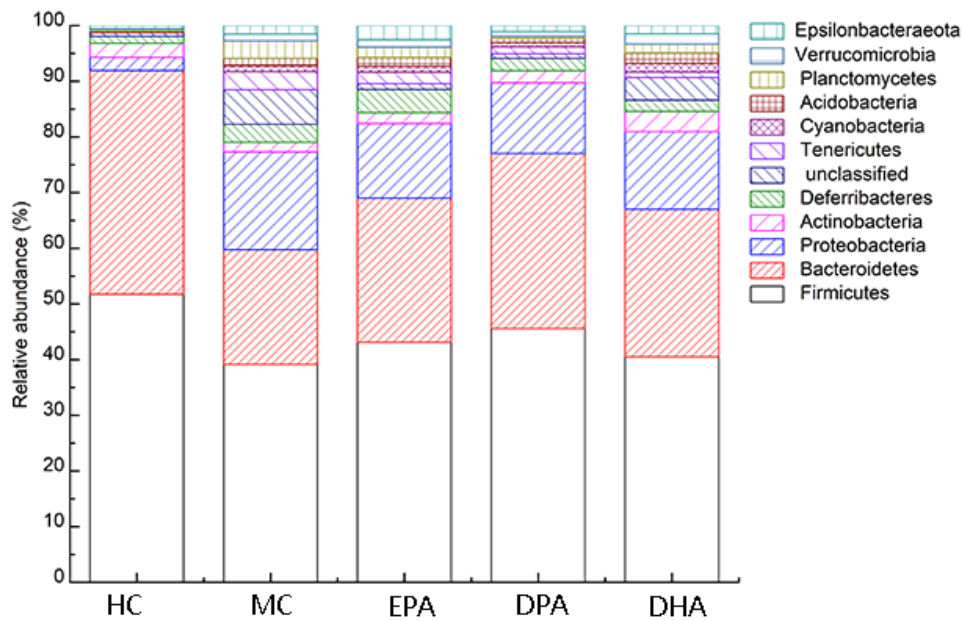

**Figure S2.** The abundance changes of the gut microbiota in the different groups at phyla level. Note: EPA, DPA, DHA, MC, HC represented EPA group, DPA group, DHA group, model control group, health control group respectively.

Table S1 The VIP value of the **genera** after OPLS-DA in Figure 5 and Figure 6

| Figure 5                    |           | Figure 6                           |           |
|-----------------------------|-----------|------------------------------------|-----------|
| Genera                      | VIP value | Genera                             | VIP value |
| <i>Allobaculum</i>          | 1.76      | <i>Parabacteroides</i>             | 1.64      |
| <i>Butyricicoccus</i>       | 1.62      | <i>Lactobacillus</i>               | 1.52      |
| <i>Akkermansia</i>          | 1.52      | <i>Escherichia-Shigella</i>        | 1.51      |
| <i>Escherichia-Shigella</i> | 1.39      | <i>Lachnospiraceae</i>             | 1.34      |
| <i>Bifidobacterium</i>      | 1.34      | <i>Butyricicoccus</i>              | 1.31      |
| <i>Ruminiclostridium_9</i>  | 1.33      | <i>Bifidobacterium</i>             | 1.26      |
| <i>Alistipes</i>            | 1.13      | <i>Ruminiclostridium_9</i>         | 1.25      |
| <i>Lactobacillus</i>        | 1.13      | <i>Desulfovibrio</i>               | 1.11      |
| <i>Bacteroides</i>          | 1.12      | <i>Akkermansia</i>                 | 1.11      |
| <i>Intestinimonas</i>       | 1.12      | <i>Alistipes</i>                   | 1.11      |
| <i>Anaerotignum</i>         | 1.1       | <i>Bacteroides</i>                 | 1.11      |
| <i>Blautia</i>              | 1.09      | <i>Allobaculum</i>                 | 1.06      |
| <i>Parabacteroides</i>      | 1.06      | <i>Mucispirillum</i>               | 1.05      |
| <i>Lactococcus</i>          | 1.04      | <i>Peptococcaceae</i>              | 0.97      |
| <i>Mucispirillum</i>        | 1.01      | <i>Faecalibacterium</i>            | 0.94      |
| <i>Acetatifactor</i>        | 0.95      | <i>Burkholderia-Caballeronia-P</i> | 0.94      |
|                             |           | <i>araburkholderia</i>             |           |
| <i>Lachnospiraceae</i>      | 0.89      | <i>Intestinimonas</i>              | 0.91      |
| <i>Oscillibacter</i>        | 0.88      | <i>Acetatifactor</i>               | 0.91      |
| <i>Ruminiclostridium_5</i>  | 0.85      | <i>Anaerotignum</i>                | 0.89      |

|                                                   |      |                                |      |
|---------------------------------------------------|------|--------------------------------|------|
| <i>Peptococcaceae</i>                             | 0.8  | <i>Eubacterium</i>             | 0.8  |
| <i>Desulfovibrio</i>                              | 0.8  | <i>Ruminiclostridium_5</i>     | 0.75 |
| <i>Kineothrix</i>                                 | 0.66 | <i>Kineothrix</i>              | 0.73 |
| <i>Roseburia</i>                                  | 0.47 | <i>Lactococcus</i>             | 0.7  |
| <i>Burkholderia-Caballeronia-Paraburkholderia</i> | 0.44 | <i>Firmicutes_unclassified</i> | 0.58 |
| <i>Faecalibacterium</i>                           | 0.43 | <i>Prevotella</i>              | 0.54 |
| <i>Prevotella</i>                                 | 0.36 | <i>Roseburia</i>               | 0.53 |
| <i>Eubacterium</i>                                | 0.27 | <i>Lachnoclostridium</i>       | 0.47 |
| <i>Lachnoclostridium</i>                          | 0.15 | <i>Oscillibacter</i>           | 0.47 |
| <i>Enterococcus</i>                               | 0.12 | <i>Enterococcus</i>            | 0.33 |
| <i>Firmicutes_unclassified</i>                    | 0.04 | <i>Blautia</i>                 | 0.32 |

Table S2 The VIP value of the **genera** after OPLS-DA in Figure 7 and Figure 8

| Figure 7                                          |           | Figure 8                                          |           |
|---------------------------------------------------|-----------|---------------------------------------------------|-----------|
| genera                                            | VIP value | genera                                            | VIP value |
| <i>Allobaculum</i>                                | 2.15      | <i>Akkermansia</i>                                | 3.34      |
| <i>Akkermansia</i>                                | 1.84      | <i>Blautia</i>                                    | 2.24      |
| <i>Escherichia-Shigella</i>                       | 1.66      | <i>Butyricicoccus</i>                             | 2.08      |
| <i>Butyricicoccus</i>                             | 1.45      | <i>Lactobacillus</i>                              | 1.37      |
| <i>Lactobacillus</i>                              | 1.45      | <i>Alistipes</i>                                  | 1         |
| <i>Bifidobacterium</i>                            | 1.41      | <i>Acetatifactor</i>                              | 0.97      |
| <i>Desulfovibrio</i>                              | 1.37      | <i>Bifidobacterium</i>                            | 0.97      |
| <i>Lactococcus</i>                                | 1.32      | <i>Allobaculum</i>                                | 0.9       |
| <i>Alistipes</i>                                  | 1.16      | <i>Bacteroides</i>                                | 0.82      |
| <i>Prevotella</i>                                 | 1.11      | <i>Ruminiclostridium_5</i>                        | 0.75      |
| <i>Bacteroides</i>                                | 1.03      | <i>Roseburia</i>                                  | 0.74      |
| <i>Oscillibacter</i>                              | 0.9       | <i>Firmicutes_unclassified</i>                    | 0.61      |
| <i>Ruminiclostridium_9</i>                        | 0.83      | <i>Peptococcaceae</i>                             | 0.56      |
| <i>Burkholderia-Caballeronia-Paraburkholderia</i> | 0.83      | <i>Parabacteroides</i>                            | 0.54      |
| <i>Enterococcus</i>                               | 0.78      | <i>Mucispirillum</i>                              | 0.52      |
| <i>Peptococcaceae</i>                             | 0.76      | <i>Anaerotignum</i>                               | 0.5       |
| <i>Acetatifactor</i>                              | 0.72      | <i>Prevotella</i>                                 | 0.42      |
| <i>Kineothrix</i>                                 | 0.56      | <i>Lactococcus</i>                                | 0.34      |
| <i>Intestinimonas</i>                             | 0.5       | <i>Lachnospiraceae</i>                            | 0.32      |
| <i>Blautia</i>                                    | 0.48      | <i>Enterococcus</i>                               | 0.25      |
| <i>Ruminiclostridium_5</i>                        | 0.48      | <i>Ruminiclostridium_9</i>                        | 0.21      |
| <i>Anaerotignum</i>                               | 0.43      | <i>Intestinimonas</i>                             | 0.2       |
| <i>Lachnoclostridium</i>                          | 0.42      | <i>Kineothrix</i>                                 | 0.2       |
| <i>Roseburia</i>                                  | 0.37      | <i>Burkholderia-Caballeronia-Paraburkholderia</i> | 0.15      |
| <i>Firmicutes_unclassified</i>                    | 0.32      | <i>Eubacterium</i>                                | 0.11      |

|                         |      |                             |      |
|-------------------------|------|-----------------------------|------|
| <i>Parabacteroides</i>  | 0.31 | <i>Lachnoclostridium</i>    | 0.06 |
| <i>Lachnospiraceae</i>  | 0.31 | <i>Escherichia-Shigella</i> | 0.05 |
| <i>Faecalibacterium</i> | 0.23 | <i>Desulfovibrio</i>        | 0.05 |
| <i>Mucispirillum</i>    | 0.21 | <i>Faecalibacterium</i>     | 0.04 |
| <i>Eubacterium</i>      | 0.13 | <i>Oscillibacter</i>        | 0.01 |

Table S3 The VIP value of the **metabolites** after OPLS-DA in Figure 10 and Figure 11

| Figure 10                                  |           | Figure 11                                  |           |
|--------------------------------------------|-----------|--------------------------------------------|-----------|
| Metabolites                                | VIP value | Metabolites                                | VIP value |
| butyrate                                   | 2.5       | cedrol                                     | 2.06      |
| 4-ethylphenol                              | 2.07      | N-carbamylglutamate                        | 1.64      |
| 6,10-dimethylundeca-5,9-dien-2-ol          | 1.74      | hexadecane                                 | 1.38      |
| N-carbamylglutamate                        | 1.17      | histamine                                  | 1.37      |
| histamine                                  | 1.03      | butyrate                                   | 1.24      |
| 3,4-dehydrobrevicommin                     | 0.88      | 2-pentylfuran                              | 1.24      |
| ethyl palmitate                            | 0.84      | (E)-2-octenal                              | 1.02      |
| 7,9-Di-tert-butyl-1-oxaspiro               | 0.83      | ethyl palmitate                            | 1.02      |
| 1,3,3-Trimethyl-1-phenylindane             | 0.76      | 2,4-Di-tert-butylphenol                    | 1.01      |
| (E)-2-octenal                              | 0.73      | Ethyl tetradecanoate                       | 0.99      |
| cedrol                                     | 0.72      | Tetradecane                                | 0.9       |
| 2,4-Di-tert-butylphenol                    | 0.64      | 1,3,3-Trimethyl-1-phenylindane             | 0.86      |
| Phenol                                     | 0.64      | 7,9-Di-tert-butyl-1-oxaspiro               | 0.81      |
| Pyrazine, 2-ethenyl-6-methyl-              | 0.61      | 2,6-Di-tert-butyl-p-benzoquinone           | 0.69      |
| Tetradecane                                | 0.56      | Dimethyltrisulfide                         | 0.67      |
| 2-pentylfuran                              | 0.44      | Hexadecanoic                               | 0.55      |
| 5,9-Undecadien-2-one, 6,10-dimethyl-, (E)- | 0.39      | 3,4-dehydrobrevicommin                     | 0.54      |
| Hexadecanoic                               | 0.37      | 4-ethylphenol                              | 0.39      |
| Ethyl tetradecanoate                       | 0.36      | Pyrazine, 2-ethenyl-6-methyl-              | 0.3       |
| 2,6-Di-tert-butyl-p-benzoquinone           | 0.26      | Phenol                                     | 0.27      |
| Hexadecane                                 | 0.12      | 5,9-Undecadien-2-one, 6,10-dimethyl-, (E)- | 0.18      |
| Dimethyltrisulfide                         | 0.07      | 6,10-dimethylundeca-5,9-dien-2-ol          | 0.03      |

Table S4 The VIP value of the **metabolites** after OPLS-DA in Figure 12 and Figure 13

| Figure 12     |           | Figure 13     |           |
|---------------|-----------|---------------|-----------|
| Metabolites   | VIP value | Metabolites   | VIP value |
| histamine     | 2.78      | 4-ethylphenol | 2.04      |
| butyrate      | 2.08      | butyrate      | 1.95      |
| 4-ethylphenol | 1.19      | 2-pentylfuran | 1.58      |

|                                   |      |                                   |      |
|-----------------------------------|------|-----------------------------------|------|
| 3,4-dehydrobrevicomine            | 1.14 | histamine                         | 1.46 |
| N-carbamylglutamate               | 1.01 | hexadecane                        | 1.24 |
| 6,10-dimethylundeca-5,9-dien-2-ol | 0.95 | 6,10-dimethylundeca-5,9-dien-2-ol | 1.18 |
| cedrol                            | 0.91 | N-carbamylglutamate               | 1.12 |
| Hexadecane                        | 0.83 | 7,9-Di-tert-butyl-1-oxaspiro      | 1.11 |
| 2,4-Di-tert-butylphenol           | 0.77 | 3,4-dehydrobrevicomine            | 0.8  |
| ethyl palmitate                   | 0.73 | ethyl palmitate                   | 0.8  |
| 7,9-Di-tert-butyl-1-oxaspiro      | 0.67 | cedrol                            | 0.76 |
| Ethyl tetradecanoate              | 0.65 | (E)-2-octenal                     | 0.73 |
| (E)-2-octenal                     | 0.62 | 2,4-Di-tert-butylphenol           | 0.62 |
| 2-pentylfuran                     | 0.52 | 1,3,3-Trimethyl-1-phenylindane    | 0.61 |
| 5,9-Undecadien-2-one,             | 0.52 | Tetradecane                       | 0.49 |
| 6,10-dimethyl-, (E)-              |      |                                   |      |
| Phenol                            | 0.45 | Dimethyltrisulfide                | 0.43 |
| 1,3,3-Trimethyl-1-phenylindane    | 0.44 | Hexadecanoic                      | 0.4  |
| Hexadecanoic                      | 0.37 | Pyrazine, 2-ethenyl-6-methyl-     | 0.3  |
| Tetradecane                       | 0.37 | Ethyl tetradecanoate              | 0.26 |
| Pyrazine, 2-ethenyl-6-methyl-     | 0.36 | 5,9-Undecadien-2-one,             | 0.2  |
|                                   |      | 6,10-dimethyl-, (E)-              |      |
| Dimethyltrisulfide                | 0.27 | 2,6-Di-tert-butyl-p-benzoquinone  | 0.2  |
|                                   |      | ne                                |      |
| 2,6-Di-tert-butyl-p-benzoquinone  | 0.14 | Phenol                            | 0.15 |
